# Supplementary material for: Identification of Superior Haplotypes and Haplotype Combinations for Grain Size- and Weight-Related Genes for Breeding Applications in Rice (Oryza sativa L.)
Source: MDPI journal article supplement (doi:10.3390/genes14122201), 2023-12-12
Supplement: s1 [file s1]

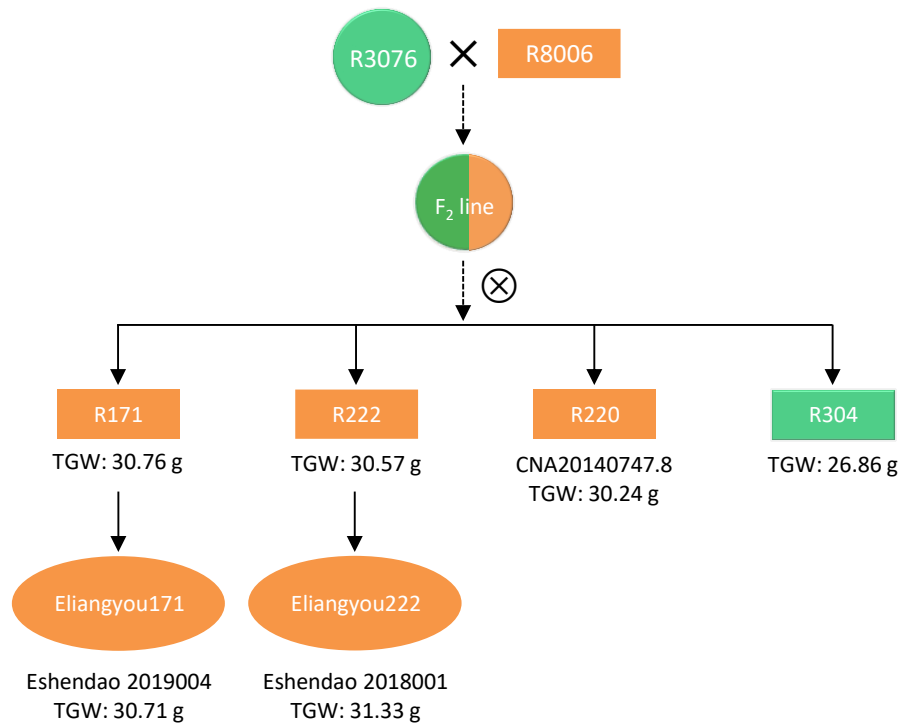

Figure S1. Pedigree and haplotype combinations related to TGW of the lines and varieties that we have developed. Yellow indicated that the varieties or lines which contain the superior haplotype-combination HC4, green indicated that the varieties or lines which do not contain the superior haplotype-combination HC4.
