# Supplementary material for: Identification of Superior Haplotypes and Haplotype Combinations for Grain Size- and Weight-Related Genes for Breeding Applications in Rice (Oryza sativa L.)
Source: Genes (Basel). 2023 Dec 12;14(12):2201. doi: 10.3390/genes14122201 (PMC10742856; doi:10.3390/genes14122201)
Supplement: Supplementary file 1 [file genes-14-02201-s001.zip › Table S1.xlsx]

## Sheet: Sheet1
Table S1. List of material information
ID	Group	Material Name	Indica/Japonica	Material Type	Material origin
B113	1	Lome01	Indica	foreign germplasm	Togo
B115	1	CARA02	Indica	foreign germplasm	Togo
B32	1	Jiuqianbasizao	Indica	landrace	Guizhou
B33	1	Zhenzhunuo	Indica	landrace	Guizhou
B98	1	Bendiniangu	Indica	landrace	Hunan
B15	1	Laoshuya	Indica	landrace	Yunnan
B17	1	Zhegangu	Indica	landrace	Yunnan
B18	1	Xiangbaigu	Indica	landrace	Yunnan
B19	1	Daxiangnuo	Indica	landrace	Yunnan
B156	1	Zhongkeheinuo1hao	Indica	line	Hainan
B158	1	B219	Indica	line	Hubei
B175	1	TG1	Indica	line	Shanghai
B24	1	10HA14-4	Indica	line	Yunnan
B27	1	Minghui63/Changruanmi	Indica	line	Yunnan
B28	1	9311/Laoshuya	Indica	line	Yunnan
B30	1	9311/9311/Jinghong wildrice	Indica	line	Yunnan
B104	1	Feigai122	Indica	restorer line	Hunan
B117	1	Anxuan6hao	Indica	variety	Anhui
B121	1	Wandao89	Indica	variety	Anhui
B125	1	Lvdao24	Indica	variety	Anhui
B133	1	Xianghui1hao	Indica	variety	Anhui
B51	1	14W-159	Indica	variety	Fujian
B52	1	Zijiahe	Indica	variety	Fujian
B56	1	Zhonghan359	Indica	variety	Guangdong
B59	1	Exiang1hao	Indica	variety	Guangdong
B105	1	Zhonghan358	Indica	variety	Guangdong
B138	1	Liushayouzhan202	Indica	variety	Guangxi
B139	1	Guifeng2hao	Indica	variety	Guangxi
B140	1	Baixiang2hao	Indica	variety	Guangxi
B94	1	Xiangwanxian13hao	Indica	variety	Hunan
B88	1	Yanhui888	Indica	variety	Jiangsu
B90	1	Nanjing16hao	Indica	variety	Jiangsu
B73	1	Ganwanxian9hao	Indica	variety	Jiangxi
B74	1	Ganwanxian39hao	Indica	variety	Jiangxi
B112	1	Fengyuanxiangdao	Indica	variety	Jiangxi
B49	1	Jianghui151	Indica	variety	Sichuan
B20	1	Hongyou7hao	Indica	variety	Yunnan
B22	1	Dianrui449	Indica	variety	Yunnan
B23	1	Yunzixian42	Indica	variety	Yunnan
B63	2	S 3429-4D-PN-1-1-2	Indica	foreign germplasm	Indonesia
B60	2	IR 79525-20-2-2-2	Indica	foreign germplasm	IRRI
B61	2	IR-BB 61	Indica	foreign germplasm	IRRI
B68	2	IR 10L234	Indica	foreign germplasm	IRRI
B107	2	IR 78875-176-B-1-B	Indica	foreign germplasm	IRRI
B109	2	IR 80692--64-3-2-1	Indica	foreign germplasm	IRRI
B106	2	PR 26703-3B-PJ7	Indica	foreign germplasm	Korea
B101	2	Xinhuangaigandao	Indica	landrace	Hunan
B16	2	Bainuo	Indica	landrace	Yunnan
B45	2	Honghui237	Indica	line	Guizhou
B46	2	Honghui242	Indica	line	Guizhou
B47	2	Honghui527	Indica	line	Guizhou
B153	2	5W1-43	Indica	line	Hubei
B154	2	5W1-95	Indica	line	Hubei
B160	2	6E031-	Indica	line	Hubei
B161	2	6E030-	Indica	line	Hubei
B165	2	16T130	Indica	line	Hubei
B166	2	TR778	Indica	line	Hubei
B173	2	S13-14	Indica	line	Hubei
B85	2	Zhen241	Indica	line	Jiangsu
B83	2	L5H782	Indica	line	Jiangxi
B176	2	TG11	Indica	line	Shanghai
B177	2	TG18	Indica	line	Shanghai
B178	2	TG80	Indica	line	Shanghai
B29	2	Minghui63//Minghui63/Diantun502	Indica	line	Yunnan
B36	2	Qianhui93	Indica	restorer line	Guizhou
B37	2	R430	Indica	restorer line	Guizhou
B39	2	R5	Indica	restorer line	Guizhou
B43	2	GZ5R-23	Indica	restorer line	Guizhou
B44	2	R148	Indica	restorer line	Guizhou
B151	2	R222	Indica	restorer line	Hubei
B152	2	R474	Indica	restorer line	Hubei
B169	2	R650	Indica	restorer line	Hubei
B120	2	Wandao77	Indica	variety	Anhui
B122	2	Zhongxian91	Indica	variety	Anhui
B124	2	Zhongxian2503	Indica	variety	Anhui
B126	2	R705	Indica	variety	Anhui
B127	2	R0128	Indica	variety	Anhui
B129	2	2M009	Indica	variety	Anhui
B134	2	R996	Indica	variety	Anhui
B53	2	M63	Indica	variety	Fujian
B55	2	Fuzhenzao1hao	Indica	variety	Fujian
B180	2	Minghui63	Indica	variety	Fujian
B6	2	Meixianzhan	Indica	variety	Guangdong
B65	2	Teqing	Indica	variety	Guangdong
B142	2	Lianyu2hao	Indica	variety	Guangxi
B143	2	Lianyu3hao	Indica	variety	Guangxi
B34	2	Guifuxian2hao	Indica	variety	Guizhou
B157	2	Ezhong5hao	Indica	variety	Hubei
B92	2	Changguidao	Indica	variety	Hunan
B95	2	Bancangxiangnuo	Indica	variety	Hunan
B87	2	Yanhui559	Indica	variety	Jiangsu
B89	2	Yanhui1120	Indica	variety	Jiangsu
B171	2	Hanhui3hao	Indica	variety	Shanghai
B172	2	Hanhui37hao	Indica	variety	Shanghai
B48	2	Wanhui910	Indica	variety	Sichuan
B179	2	Yihui1577	Indica	variety	Sichuan
B21	2	Banna21hao	Indica	variety	Yunnan
B14	3	41679	Indica	foreign germplasm	-
B66	3	1-Y4-Y1	Indica	foreign germplasm	-
B147	3	41638	Indica	foreign germplasm	-
B148	3	41670	Indica	foreign germplasm	-
B62	3	CT 18372-5-9-1-2-2-1	Indica	foreign germplasm	CIAT
B108	3	IR 78914-B-22-B-B-B	Indica	foreign germplasm	IRRI
B114	3	Lome06	Indica	foreign germplasm	Togo
B163	3	Mingkezhan	Indica	landrace	-
B31	3	Hebaogu	Indica	landrace	Guizhou
B35	3	Xiaohuangnuo	Indica	landrace	Guizhou
B91	3	Changchunbendinuogu	Indica	landrace	Hunan
B97	3	Shuidao	Indica	landrace	Hunan
B99	3	Yuchi	Indica	landrace	Hunan
B102	3	Nanpingnuogu	Indica	landrace	Hunan
B103	3	Jingnuogu	Indica	landrace	Hunan
B111	3	Wener23	Indica	landrace	Jiangxi
B135	3	OZ57-6	Indica	line	Anhui
B136	3	OZ57-11	Indica	line	Anhui
B137	3	M480	Indica	line	Anhui
B2	3	Pin184	Indica	line	Guangdong
B8	3	GXG 8	Indica	line	Guangxi
B145	3	GXY1	Indica	line	Guangxi
B146	3	GXY6	Indica	line	Guangxi
B159	3	XMY16	Indica	line	Hubei
B162	3	6E058-	Indica	line	Hubei
B164	3	TR45	Indica	line	Hubei
B86	3	Huangtaizhan	Indica	line	Jiangsu
B81	3	L630884	Indica	line	Jiangxi
B82	3	L5H719	Indica	line	Jiangxi
B174	3	HR-74	Indica	line	Shanghai
B25	3	11HA201-27	Indica	line	Yunnan
B26	3	11HA220-7	Indica	line	Yunnan
B13	3	YuII30	Indica	restorer line	Guangxi
B144	3	GR55	Indica	restorer line	Guangxi
B38	3	G569	Indica	restorer line	Guizhou
B40	3	Kaihui608	Indica	restorer line	Guizhou
B149	3	R203	Indica	restorer line	Hubei
B150	3	Q28	Indica	restorer line	Hubei
B167	3	R476	Indica	restorer line	Hubei
B168	3	Xiang5	Indica	restorer line	Hubei
B170	3	R2806	Indica	restorer line	Hubei
B116	3	Zaoxian899	Indica	variety	Anhui
B118	3	Laijiu	Indica	variety	Anhui
B119	3	Liangjifu	Indica	variety	Anhui
B123	3	Wandao101	Indica	variety	Anhui
B128	3	7M059	Indica	variety	Anhui
B130	3	YR901	Indica	variety	Anhui
B131	3	Hong98	Indica	variety	Anhui
B132	3	Fenghui3hao	Indica	variety	Anhui
B50	3	14W-104	Indica	variety	Fujian
B54	3	Zhuke1hao	Indica	variety	Fujian
B71	3	Nenggan2hao	Indica	variety	Fujian
B1	3	Aixianzhan	Indica	variety	Guangdong
B3	3	Aomeizhan	Indica	variety	Guangdong
B4	3	Lvjingzhan1	Indica	variety	Guangdong
B5	3	Aomeizhan2	Indica	variety	Guangdong
B7	3	Aomeizhan1	Indica	variety	Guangdong
B57	3	Zhonghan367	Indica	variety	Guangdong
B58	3	Zhonghan368	Indica	variety	Guangdong
B64	3	Shuangchao25	Indica	variety	Guangdong
B67	3	Texianzhan13	Indica	variety	Guangdong
B69	3	Fengfuzhan	Indica	variety	Guangdong
B70	3	Yexianzhan6hao	Indica	variety	Guangdong
B72	3	Shuangzhunian	Indica	variety	Guangdong
B78	3	Baiyusimiao	Indica	variety	Guangdong
B79	3	Molixiangzhan	Indica	variety	Guangdong
B84	3	Qinggeng21	Indica	variety	Guangdong
B110	3	Shengtai1hao	Indica	variety	Guangdong
B9	3	Youzhan8hao	Indica	variety	Guangxi
B10	3	Guihuazhan	Indica	variety	Guangxi
B11	3	Wenxiangzhan	Indica	variety	Guangxi
B12	3	Guihuazhan1	Indica	variety	Guangxi
B75	3	Guangxixiangdao	Indica	variety	Guangxi
B141	3	Nongle1hao	Indica	variety	Guangxi
B41	3	Kaihong5hao	Indica	variety	Guizhou
B42	3	Xiligongmi	Indica	variety	Guizhou
B155	3	Q7	Indica	variety	Hubei
B93	3	Changguidao	Indica	variety	Hunan
B96	3	Wanxianzibao	Indica	variety	Hunan
B100	3	Huahuidao	Indica	variety	Hunan
B76	3	F6	Indica	variety	Jiangxi
B77	3	Jiuxiangnian	Indica	variety	Jiangxi
B80	3	Xinliyouzhan	Indica	variety	Jiangxi
