# Supplementary material for: Identification of Superior Haplotypes and Haplotype Combinations for Grain Size- and Weight-Related Genes for Breeding Applications in Rice (Oryza sativa L.)
Source: Genes (Basel). 2023 Dec 12;14(12):2201. doi: 10.3390/genes14122201 (PMC10742856; doi:10.3390/genes14122201)
Supplement: Supplementary file 1 [file genes-14-02201-s001.zip › Table S2.xlsx]

## Sheet: Sheet1
Table S2. List of sequenced genes and related information
Gene	Gene ID (MSU)	Chromosome	Captured Region		Trait	References
			Start (bp)	End (bp)
Gn1a	LOC_Os01g10110	1	5270449	5277585	Grain productivity	Motoyuki et al. Science. 2005, 309(5735): 741-745.
OsAAP6	LOC_Os01g65670	1	38133475	38139770	Grain protein content and nutritional quality	Peng et al. Nat. Commun. 2014, 5(1): 4847.
SKC1	LOC_Os01g20160	1	11458956	11465442	Salt tolerance	Ren et al. Nat. Genet. 2005, 37(10): 1141-1146.
GS2	LOC_Os02g47280	2	28863274	28868997	Grain size and yield	Duan et al. Nat. Plants. 2015, 2(1): 1-5.
GW2	LOC_Os02g14720	2	8113223	8121651	Grain width and grain weight	Song et al. Nat. Genet. 2007, 39(5): 623-630.
LG1	LOC_Os02g14730	2	8133122	8143345	Grain width and size	Shi et al. Plant Physiol. 2019, 180(1): 381-391.
SIT1	LOC_Os02g42780	2	25723956	25728080	Salt tolerance	Li et al. Plant Cell. 2014, 26(6): 2538-2553.
OsSKIPa	LOC_Os02g52250	2	31995344	31999696	Stress tolerance	Hou et al. PNAS. 2009, 106(15): 6410-6415.
BG1	LOC_Os03g07920	3	4038341	4041509	Grain size	Liu et al. PNAS.2015, 112(35): 11102-11107.
DST	LOC_Os03g57240	3	32645695	32648908	Salt and drought tolerance	Huang et al. Genes Dev. 2009, 23(15): 1805-1817.
EL1	LOC_Os03g57940	3	32997502	33006898	Heading date	Dai et al. EMBO J. 2010, 29(11): 1916-1927.
GL3.1	LOC_Os03g44500	3	25042427	25053072	Grain size and yield	Qi et al. Cell Res. 2012, 22(12): 1666-1680.
GL6	LOC_Os03g62500	3	35385957	35393982	Grain length and number	Wang et al. Plant Physiol. 2019, 180(4): 2077-2090.
GS3	Os03g0407400	3	16729501	16737109	Grain length and weight	Fan et al. Theor. Appl. Genet. 2006, 112: 1164-1171.
SNAC1	LOC_Os03g60080	3	34164100	34167521	Salt and drought tolerance, grain yield	Hu et al. PNAS. 2006, 103(35): 12987-12992.
TOGR1	LOC_Os03g46610	3	26380709	26387454	Thermotolerant	Wang et al. PLoS Genet. 2006, 12(2): e1005844.
TT1	LOC_Os03g26970	3	15418151	15424562	Thermotolerant	Li et al. Nat. Genet. 2015, 47(7): 827-833.
GIF1	LOC_Os04g33740	4	20420171	20426921	Grain-filling and yield	Wang et al. Nat. Genet. 2008, 40(11): 1370-1374.
STRK1	LOC_Os04g45730	4	27058378	27061975	Salt tolerance	Zhou et al. Plant Cell, 2018, 30(5): 1100–1118
DWA1	LOC_Os04g39780	4	23698662	23709348	Drought tolerance	Zhu et al. PNAS. 2013, 110(44): 17790-17795.
AET1	LOC_Os05g45890	5	26589792	26596379	Thermotolerant	Chen et al. Mol. Plant. 2019, 12(8): 1123-1142.
Chalk5	LOC_Os05g06480	5	3335380	3341817	Grain chalkiness	Li et al. Nat. Genet. 2014, 46(4): 398-404.
GS5	LOC_Os05g06660	5	3439304	3445769	Grain size and yield	Li et al. Nat. Genet. 2011, 43(12): 1266-1269.
GSN1	LOC_Os05g02500	5	858399	864739	Grain number per panicle and grain size	Guo et al. Plant Cell. 2018, 30(4): 871-888.
GW5	LOC_Os05g09520	5	5363122	5366701	Grain width and weight	Weng et al. Cell Res. 2008, 18(12): 1199-1209.
ALK	LOC_Os06g12450	6	6746398	6753302	Grain quality	Gao et al. J. Integr. Plant Biol., 2011, 53(9): 756-765
Gw6a	LOC_Os06g44100	6	26591904	26595469	Grain weight, yield, and plant biomass	Song et al. PNAS. 2015, 112(1): 76-81.
OsELF3	LOC_Os06g05060	6	2234581	2241058	Heading date	Saito et al. Plant Cell Physiol. 2012, 53(4): 717-728.
Wx	LOC_Os06g04200	6	1763622	1770653	Grain quality	Wang et al. NAR. 1990, 18(19): 5898.
Ghd7	LOC_Os07g15770	7	24664328	24671321	Grain number, plant height, heading date	Xue et al. Nat. Genet. 2008, 40(6): 761-767.
Ghd7.1	LOC_Os07g49460	7	29614705	29629215	Spikelets per panicle, plant height, heading date	Yan et al. Cell Res. 2013, 23(7): 969-971.
GL7	LOC_Os07g41200	7	24664328	24671321	Grain length and weight	Wang et al. Nat. Genet. 2015, 47(8): 944-948.
Ghd8	LOC_Os08g07740	8	4332106	4336829	Flowering, plant height and yield	Yan et al. Mol. Plant. 2011, 4(2): 319-330.
GW8	LOC_Os08g41940	8	26499167	26506198	Grain size, shape and quality	Wang et al. Nat. Genet. 2012, 44(8): 950-954.
RAE2	LOC_Os08g37890	8	23996787	24000176	Grain number, Grain length, Awn development	Kanako et al. PNAS. 2016, 113(32): 8969-8974.
IPA1	LOC_Os08g39890	8	25274541	25280696	Plant architecture, panicle branching, grain yield	Jiao et al. Nat. Genet. 2010, 42(6): 541-544.
DEP1	LOC_Os09g26999	9	16409151	16415851	Erect panicle, grain yield, nitrogen-use efficiency	Huang et al. Nat. Genet. 2009, 41(4): 494-497.
LVP1	LOC_Os09g13740	9	8039179	8048886	Heading date	Sun et al. Plant Cell, 2012, 24(8): 3235-3247
DRO1	LOC_Os09g26840	9	16307780	16312837	Drought tolerance	Yusaku et al. Nat. Genet. 2013, 45(9): 1097-1102.
OsGluA2	LOC_Os10g26060	10	13497363	13501401	Grain protein content	Yang et al. Nat. Commun., 2019, 10: 1949
Ehd2	LOC_Os10g28330	10	14739644	14745222	Heading date	Wu et al. PNAS. 2008, 105(35): 12915-12920.
DHD1	LOC_Os11g47920	11	28897015	28900796	Heading date	Zhang et al. Plant Biotechnol. J., 2019, 17(2): 531-539

## Sheet: Sheet2
	References
	Motoyuki Ashikari, et al. Cytokinin oxidase regulates rice grain production. Science, 309.5735 (2005): 741-745.
	Peng Bo, et al. OsAAP6 functions as an important regulator of grain protein content and nutritional quality in rice. Nature communications, 5.1 (2014): 4847.
	Ren Zhong-Hai, et al. A rice quantitative trait locus for salt tolerance encodes a sodium transporter. Nature genetics, 37.10 (2005): 1141-1146.
	Duan Penggen, et al. Regulation of OsGRF4 by OsmiR396 controls grain size and yield in rice. Nature plants, 2.1 (2015): 1-5.
	Song anJun, et al. A QTL for rice grain width and weight encodes a previously unknown RING-type E3 ubiquitin ligase. Nature genetics, 39.5 (2007): 623-630.
	Shi Cuilan, et al. Ubiquitin specific protease 15 has an important role in regulating grain width and size in rice. Plant physiology, 180.1 (2019): 381-391.
	Li Chen Hui, et al. The receptor-like kinase SIT1 mediates salt sensitivity by activating MAPK3/6 and regulating ethylene homeostasis in rice. The Plant Cell, 26.6 (2014): 2538-2553.
	Hou X, et al. A homolog of human ski-interacting protein in rice positively regulates cell viability and stress tolerance. Proceedings of the National Academy of Sciences, 106.15 (2009): 6410-6415.
	Liu Linchuan, et al. Activation of Big Grain1 significantly improves grain size by regulating auxin transport in rice. Proceedings of the National Academy of Sciences, 112.35 (2015): 11102-11107.
	Huang xy, et al. A previously unknown zinc finger protein, DST, regulates drought and salt tolerance in rice via stomatal aperture control. Genes & development, 23.15 (2009): 1805-1817.
	Dai Cheng, et al. Rice early flowering1, a CKI, phosphorylates DELLA protein SLR1 to negatively regulate gibberellin signalling. The EMBO Journal 29.11 (2010): 1916-1927.
	Qi Peng, et al. The novel quantitative trait locus GL3. 1 controls rice grain size and yield by regulating Cyclin-T1; 3. Cell research 22.12 (2012): 1666-1680.
	Wang A, et al. The PLATZ transcription factor GL6 affects grain length and number in rice. Plant Physiology, 180.4 (2019): 2077-2090.
	Fan Chuchuan, et al. GS3, a major QTL for grain length and weight and minor QTL for grain width and thickness in rice, encodes a putative transmembrane protein. Theoretical and applied genetics, 112 (2006): 1164-1171.
	Hu, Honghong, et al. Overexpressing a NAM, ATAF, and CUC (NAC) transcription factor enhances drought resistance and salt tolerance in rice. Proceedings of the National Academy of Sciences 103.35 (2006): 12987-12992.
	Wang Dong, et al. Nucleolar DEAD-box RNA helicase TOGR1 regulates thermotolerant growth as a pre-rRNA chaperone in rice. PLoS genetics, 12.2 (2016): e1005844.
	Li XM, et al. Natural alleles of a proteasome α2 subunit gene contribute to thermotolerance and adaptation of African rice. Nature genetics, 47.7 (2015): 827-833.
	Wang Ertao, et al. Control of rice grain-filling and yield by a gene with a potential signature of domestication. Nature genetics, 40.11 (2008): 1370-1374.
	周延彪. 水稻类受体胞质激酶STRK1调节盐胁迫的分子遗传及生化分析[D].湖南大学,2017.
	Zhu, Xiaoyi, and Lizhong XIong. Putative megaenzyme DWA1 plays essential roles in drought resistance by regulating stress-induced wax deposition in rice. Proceedings of the National Academy of Sciences, 110.44 (2013): 17790-17795.
	Chen Ke, et al. Translational regulation of plant response to high temperature by a dual-function tRNAHis guanylyltransferase in rice. Molecular plant, 12.8 (2019): 1123-1142.
	Li Yibo, et al. Chalk5 encodes a vacuolar H+-translocating pyrophosphatase influencing grain chalkiness in rice. Nature genetics, 46.4 (2014): 398-404.
	Li Yibo, et al. Natural variation in GS5 plays an important role in regulating grain size and yield in rice. Nature genetics, 43.12 (2011): 1266-1269.
	Guo Tao, et al. GRAIN SIZE AND NUMBER1 negatively regulates the OsMKKK10-OsMKK4-OsMPK6 cascade to coordinate the trade-off between grain number per panicle and grain size in rice. The Plant Cell, 30.4 (2018): 871-888.
	Weng Jianfeng, et al. Isolation and initial characterization of GW5, a major QTL associated with rice grain width and weight. Cell research, 18.12 (2008): 1199-1209.
	高振宇,曾大力,崔霞等.水稻稻米糊化温度控制基因ALK的图位克隆及其序列分析[J].中国科学(C辑:生命科学),2003(06):481-487.
	Song XJ, et al. Rare allele of a previously unidentified histone H4 acetyltransferase enhances grain weight, yield, and plant biomass in rice. Proceedings of the National Academy of Sciences 112.1 (2015): 76-81.
	Saito Hiroki, et al. Ef7 encodes an ELF3-like protein and promotes rice flowering by negatively regulating the floral repressor gene Ghd7 under both short-and long-day conditions. Plant and Cell Physiology, 53.4 (2012): 717-728.
	Wang Zong-yang, et al. Nucleotide sequence of rice waxy gene. Nucleic Acids Research, 18.19 (1990): 5898.
	Xue Weiya, et al. Natural variation in Ghd7 is an important regulator of heading date and yield potential in rice. Nature genetics, 40.6 (2008): 761-767.
	Yan Wenhao, et al. Natural variation in Ghd7. 1 plays an important role in grain yield and adaptation in rice. Cell research, 23.7 (2013): 969-971.
	Wang Yuexing, et al. Copy number variation at the GL7 locus contributes to grain size diversity in rice. Nature genetics, 47.8 (2015): 944-948.
	Yan WenHao, et al. A major QTL, Ghd8, plays pleiotropic roles in regulating grain productivity, plant height, and heading date in rice. Molecular plant, 4.2 (2011): 319-330.
	Wang Shaokui, et al. Control of grain size, shape and quality by OsSPL16 in rice. Nature genetics, 44.8 (2012): 950-954.
	Bessho-Uehara Kanako, et al. Loss of function at RAE2, a previously unidentified EPFL, is required for awnlessness in cultivated Asian rice. Proceedings of the National Academy of Sciences 113.32 (2016): 8969-8974.
	Jiao Yongqing, et al. Regulation of OsSPL14 by OsmiR156 defines ideal plant architecture in rice. Nature genetics, 42.6 (2010): 541-544.
	Huang X, et al. Natural variation at the DEP1 locus enhances grain yield in rice. Nature genetics, 41.4 (2009): 494-497.
	吴晶晶,魏子尧,杨春艳等.控制水稻抽穗延迟基因OsSET34的鉴定和图位克隆[J].南京农业大学学报,2015,38(05):704-711.
	Uga Yusaku, et al. Control of root system architecture by DEEPER ROOTING 1 increases rice yield under drought conditions. Nature genetics, 45.9 (2013): 1097-1102.
	杨宜豪. 稻米蛋白质含量QTL qGPC-10的图位克隆与功能研究[D].扬州大学,2021.
	Wu Changyin, et al. RID1, encoding a Cys2/His2-type zinc finger transcription factor, acts as a master switch from vegetative to floral development in rice. Proceedings of the National Academy of Sciences, 105.35 (2008): 12915-12920.
	张欢.水稻调控抽穗期关键基因DHD1的功能分析及水稻叶色基因OsCHLI的功能研究[D].南京农业大学,2018
