# Supplementary material for: Identification of Superior Haplotypes and Haplotype Combinations for Grain Size- and Weight-Related Genes for Breeding Applications in Rice (Oryza sativa L.)
Source: Genes (Basel). 2023 Dec 12;14(12):2201. doi: 10.3390/genes14122201 (PMC10742856; doi:10.3390/genes14122201)
Supplement: Supplementary file 1 [file genes-14-02201-s001.zip › Table S3.xlsx]

## Sheet: Sheet1
Table S3. Average variation and heritability of grain-related traits in rice across different environments
		Mean	Max	Min	Kurt	Skew	h2
Grain length (mm)	2018	8.58346	12.97	6.6	-0.132666	0.190911	0.93926
	2019	8.52358	11.68	6.71	-0.79659	0.189965
	BLUP	8.5535	11.396	6.832	-0.904214	0.119794
Grain width (mm)	2018	2.97654	3.71	2.29	-1.14908	0.268368	0.862565
	2019	2.85055	3.56	2.16	-1.21552	0.248772
	BLUP	2.91356	3.618	2.275	-1.20723	0.286477
Length-Width ratio	2018	2.95547	4.7	1.91	-1.04295	-0.218027	0.907102
	2019	3.12087	5	2	-1.03038	-0.13603
	BLUP	3.03816	4.638	1.973	-1.10486	-0.225157
Thousand-grain weight (g)	2018	25.5526	35.03	16.43	0.154564	-0.217518	0.797679
	2019	25.0051	35.86	15.15	0.23498	-0.172806
	BLUP	25.2789	34.796	16.426	0.347387	-0.243254
