# Supplementary material for: Identification of Superior Haplotypes and Haplotype Combinations for Grain Size- and Weight-Related Genes for Breeding Applications in Rice (Oryza sativa L.)
Source: Genes (Basel). 2023 Dec 12;14(12):2201. doi: 10.3390/genes14122201 (PMC10742856; doi:10.3390/genes14122201)
Supplement: Supplementary file 1 [file genes-14-02201-s001.zip › Table S4.xlsx]

## Sheet: Sheet1
Table S4. list of trait-associated genes identified by candidate gene-based association analysis
Trait	Gene	Locus ID	Gene Function	Chomosome	Position	P value			Variant Locus	Variant Type	Functional Class
						2018	2019	BLUP
GL	BG1	LOC_Os03g07920	Grain size	3	4039518	0.000131036	1.92714e-05	2.29464e-05	Promoter	SNP
				3	4039574	0.000131036	1.92714e-05	2.29464e-05	Promoter	Indel
				3	4040150	0.000131036	1.92714e-05	2.29464e-05	Promoter	SNP
				3	4040973	0.000131036	1.92714e-05	2.29464e-05	Promoter	SNP
	GS3	Os03g0407400	grain length and weight	3	16729492	0.00036592	0.00118074	0.000581217	UTR_3	SNP
				3	16730043	0.00036592	0.00118074	0.000581217	Exon	Indel	Codon Deletion
				3	16730966	0.00036592	0.00118074	0.000581217	Intron	SNP
				3	16730977	0.00036592	0.00118074	0.000581217	Intron	SNP
				3	16730993	0.00036592	0.00118074	0.000581217	Intron	SNP
				3	16731043	0.00181208	0.00376176	0.00246115	Intron	SNP
				3	16731102	0.000604546	0.00145103	0.000836088	Intron	Indel
				3	16731141	0.00288374	0.00619304	0.0041429	Intron	SNP
				3	16731270	0.00036592	0.00118074	0.000581217	Intron	SNP
				3	16732254	0.00036592	0.00118074	0.000581217	Intron	Indel
				3	16732377	0.00036592	0.00118074	0.000581217	Intron	SNP
				3	16732542	0.00036592	0.00118074	0.000581217	Intron	Indel
				3	16732795	0.00036592	0.00118074	0.000581217	Intron	SNP
				3	16733441	0.000559699	0.00208853	0.00100379	Exon	SNP	Nonsense
				3	16733773	0.00036592	0.00118074	0.000581217	Intron	SNP
				3	16734121	0.00036592	0.00118074	0.000581217	Intron	SNP
				3	16734333	0.00036592	0.00118074	0.000581217	Intron	SNP
				3	16734618	0.00036592	0.00118074	0.000581217	Intron	SNP
				3	16734646	0.00036592	0.00118074	0.000581217	Intron	SNP
				3	16734715	0.00036592	0.00118074	0.000581217	Intron	SNP
				3	16734791	0.00036592	0.00118074	0.000581217	Intron	SNP
				3	16734889	0.00036592	0.00118074	0.000581217	Intron	SNP
				3	16735437	0.00036592	0.00118074	0.000581217	Promoter	SNP
				3	16735605	0.00036592	0.00118074	0.000581217	Promoter	SNP
				3	16735998	0.00036592	0.00118074	0.000581217	Promoter	SNP
				3	16736049	0.0018466	0.00584736	0.00330671	Promoter	SNP
				3	16736089	0.00036592	0.00118074	0.000581217	Promoter	SNP
				3	16736141	0.00036592	0.00118074	0.000581217	Promoter	SNP
				3	16736632	0.00036592	0.00118074	0.000581217	Promoter	SNP
				3	16736681	0.00036592	0.00118074	0.000581217	Promoter	SNP
				3	16736920	0.00036592	0.00118074	0.000581217	Promoter	SNP
GW	GW5	LOC_Os05g09520	grain width and weight	5	5363581	1.16327e-05	1.31531e-06	1.56538e-06	Promoter	SNP
				5	5363587	1.16327e-05	1.31531e-06	1.56538e-06	Promoter	SNP
				5	5363611	9.73627e-06	1.06263e-06	1.26462e-06	Promoter	SNP
				5	5364561	3.73972e-07	1.41557e-08	1.97721e-08	Promoter	SNP
				5	5364607	3.73972e-07	1.41557e-08	1.97721e-08	Promoter	Indel
				5	5365256	3.73972e-07	1.41557e-08	1.97721e-08	Exon	SNP	Silent
				5	5366483	3.73972e-07	1.41557e-08	1.97721e-08	Exon	Indel	Codon Deletion
L/W	BG1	LOC_Os05g45890	Grain size	3	4039518	0.0073956	0.00178325	0.00244652	Promoter	SNP
				3	4039574	0.0073956	0.00178325	0.00244652	Promoter	SNP
				3	4040150	0.0073956	0.00178325	0.00244652	Promoter	SNP
				3	4040973	0.0073956	0.00178325	0.00244652	Promoter	SNP
	GW5	LOC_Os05g09520	grain width and weight	5	5363581	0.000491768	0.000639315	0.000398305	Promoter	SNP
				5	5363587	0.000491768	0.000639315	0.000398305	Promoter	SNP
				5	5363611	0.000447858	0.000558845	0.000351029	Promoter	SNP
				5	5364561	7.1238e-05	5.47278e-05	3.6053e-05	Promoter	SNP
				5	5364607	7.1238e-05	5.47278e-05	3.6053e-05	Promoter	Indel
				5	5365256	7.1238e-05	5.47278e-05	3.6053e-05	Exon	SNP	Silent
				5	5366483	7.1238e-05	5.47278e-05	3.6053e-05	Exon	Indel	Codon Deletion
TGW	SNAC1	LOC_Os03g60080	drought resistance and grain yield	3	34166001	0.00615272	0.00618748	0.00442521	Promoter	SNP
	qTGW3	LOC_Os03g62500	grain Size and weight	3	35389784	0.00229519	0.00953763	0.00367174	Intron	SNP
				3	35390559	0.00229519	0.00953763	0.00367174	Intron	SNP
				3	35390811	0.00229519	0.00953763	0.00367174	Intron	SNP
				3	35390886	0.00229519	0.00953763	0.00367174	Intron	SNP
				3	35392749	0.00229519	0.00953763	0.00367174	Promoter	Indel
				3	35393547	0.00229519	0.00953763	0.00367174	Promoter	SNP
	GW5	LOC_Os05g09520	grain width and weight	5	5363581	0.00115662	0.00333468	0.00129214	Promoter	SNP
				5	5363587	0.00115662	0.00333468	0.00129214	Promoter	SNP
				5	5363611	0.00107732	0.00333497	0.00124722	Promoter	SNP
				5	5364561	0.00015801	0.000508545	0.000147857	Promoter	SNP
				5	5364607	0.00015801	0.000508545	0.000147857	Promoter	Indel
				5	5365256	0.00015801	0.000508545	0.000147857	Exon	SNP	Silent
				5	5366483	0.00015801	0.000508545	0.000147857	Exon	Indel	Codon Deletion
	AET1	LOC_Os05g45890	heat resistance	5	26591471	0.000307054	0.000635926	0.000228681	Promoter	Indel
	DHD1	LOC_Os11g47920	delays heading date and enhances yield	11	28898626	0.00640573	0.00895009	0.00609591	Promoter	SNP
