# Supplementary material for: Identification of Superior Haplotypes and Haplotype Combinations for Grain Size- and Weight-Related Genes for Breeding Applications in Rice (Oryza sativa L.)
Source: Genes (Basel). 2023 Dec 12;14(12):2201. doi: 10.3390/genes14122201 (PMC10742856; doi:10.3390/genes14122201)
Supplement: Supplementary file 1 [file genes-14-02201-s001.zip › Table S5.xlsx]

## Sheet: sheet1
Table S5. Sequence variations of the genes associated with the traits.
Gene	chrom	pos	alleles	Haplotype (H1)	Haplotype (H2)	Variant Locus
BG1	3	4039518	A/G	A	G	Promoter
	3	4039574	C/CG	C	CG	Promoter
	3	4040150	A/G	A	G	Promoter
	3	4040973	A/T	A	T	Promoter
GS3	3	16729492	A/G	A	G	UTR_3
	3	16730043	A/AAGG	AAGG	A	Exon
	3	16730966	C/A	C	A	Intron
	3	16730977	A/G	A	G	Intron
	3	16730993	C/A	C	A	Intron
	3	16731043	T/C	T	C	Intron
	3	16731102	A/AT	AT	A	Intron
	3	16731141	G/C	G	C	Intron
	3	16731270	T/C	T	C	Intron
	3	16732254	T/TTTTTG	TTTTTG	T	Intron
	3	16732377	T/C	T	C	Intron
	3	16732542	G/GT	G	GT	Intron
	3	16732795	A/C	A	C	Intron
	3	16733441	T/G	T	G	Exon
	3	16733773	T/A	T	A	Intron
	3	16734121	A/C	A	C	Intron
	3	16734333	C/A	C	A	Intron
	3	16734618	T/C	T	C	Intron
	3	16734646	G/A	G	A	Intron
	3	16734715	T/C	T	C	Intron
	3	16734791	A/G	A	G	Intron
	3	16734889	A/C	A	C	Intron
	3	16735437	C/G	C	G	Promoter
	3	16735605	A/C	A	C	Promoter
	3	16735998	T/C	T	C	Promoter
	3	16736049	T/C	T	C	Promoter
	3	16736089	A/T	A	T	Promoter
	3	16736141	T/C	T	C	Promoter
	3	16736632	T/C	T	C	Promoter
	3	16736681	T/G	T	G	Promoter
	3	16736920	A/C	A	C	Promoter
GW5	5	5363581	C/T	C	T	Promoter
	5	5363587	T/C	T	C	Promoter
	5	5363611	A/G	A	G	Promoter
	5	5364561	G/T	G	T	Promoter
	5	5364607	G/GT	GT	G	Promoter
	5	5365256	A/G	A	G	Exon
	5	5366483	A/ACCGGCGGCGCCGGCG	A	ACCGGCGGCGCCGGCG	Exon
SNAC1	3	34166001	C/T	C	T	Promoter
GL6	3	35389784	A/T	A	T	Intron
	3	35390559	A/C	A	C	Intron
	3	35390811	A/C	A	C	Intron
	3	35390886	G/C	G	C	Intron
	3	35392749	A/AT	A	AT	Promoter
	3	35393547	T/C	T	C	Promoter
AET1	5	26591471	T/TA	T	TA	Promoter
DHD1	11	28898626	C/T	C	T	Promoter
