# Supplementary material for: Identification of Superior Haplotypes and Haplotype Combinations for Grain Size- and Weight-Related Genes for Breeding Applications in Rice (Oryza sativa L.)
Source: Genes (Basel). 2023 Dec 12;14(12):2201. doi: 10.3390/genes14122201 (PMC10742856; doi:10.3390/genes14122201)
Supplement: Supplementary file 1 [file genes-14-02201-s001.zip › Table S6.xlsx]

## Sheet: Sheet1
Table S6. Information on haplotype-specific molecular marker primers for the genes associated with TGW.
Marker Name	Position	Variant SNP	Primer Name	Primer Sequence	Fluorescence
SNAC1-3416	34166001	C	SNAC1-3416Fc	GAAGGTGACCAAGTTCATGCTTTT	FAM
				CATCCCATCTCCTCTTCTTC
		T	SNAC1-3416Ft	GAAGGTCGGAGTCAACGGATTTTT	HEX
				CATCCCATCTCCTCTTCTTT
			SNAC1-3416R	GAGGGAGGTAGTCTGGAAGGTTC
qTGW3-3538	35389784	T	GL6-3538Ft	GAAGGTGACCAAGTTCATGCTACATGG	FAM
				TCCATTGATATTTTACAGGAAAAAAAT
		A	GL6-3538Fa	GAAGGTCGGAGTCAACGGATTACATGG	HEX
				TCCATTGATATTTTACAGGAAAAAAAA
			GL6-3538R	AGGAACAAGGGGGCACATTT
qTGW3-35390	35390559	C	GL6-35390Fc	GAAGGTGACCAAGTTCATGCTACAAAT	FAM
				TGCAAGGATGAAAGCGAAAC
		A	GL6-35390Fa	GAAGGTCGGAGTCAACGGATTACAAAT	HEX
				TGCAAGGATGAAAGCGAAAA
			GL6-35390R	CTACGATCCGTGGCCGAAAT
qTGW3-35391	35390811	C	GL6-35391Fc	GAAGGTGACCAAGTTCATGCTACAACA	FAM
				TGTCAAATTTGCAGAGTAGC
		A	GL6-35391Fa	GAAGGTCGGAGTCAACGGATTACAACA	HEX
				TGTCAAATTTGCAGAGTAGA
			GL6-35391R	AGCCACTGTGCCTTTCTGAG
qTGW3-35393	35393547	C	GL6-35393Rg	GAAGGTGACCAAGTTCATGCTCATGCA	FAM
				GAGGTACAGCTAACAGATG
		T	GL6-35393Ra	GAAGGTCGGAGTCAACGGATTCATGCA	HEX
				GAGGTACAGCTAACAGATA
			GL6-35393F	AGTGCTCATGTGTGCTGTGA
GW5-5364	5364561	T	GW5-5364Ft	GAAGGTGACCAAGTTCATGCTTGGTCT	FAM
				GAATTGTTCGTTATTAAGGGTAAAT
		G	GW5-5364Fg	GAAGGTCGGAGTCAACGGATTTGGTCT	HEX
				GAATTGTTCGTTATTAAGGGTAAAG
			GW5-5364R	GTGATGCCAATAAAATGGATGACC
GW5-5366	5366483	ACCGGCGG	GW5-5366Fc	GAAGGTGACCAAGTTCATGCTGAGAC	FAM
		CGCCGGCG		CGGCGGCGC
		A	GW5-5366Fg	GAAGGTCGGAGTCAACGGATTGAGAC	HEX
				CGGCGGCGG
			GW5-5366R2	CAAGCTCGCCCTGGACTC
AET1-2659	26591471	T	AET1-2659Fg	GAAGGTGACCAAGTTCATGCTTTGACC	FAM
				GTCCGTCTTTAAAAAG
		TA	AET1-2659Fa	GAAGGTCGGAGTCAACGGATTTTGACC	HEX
				GTCCGTCTTTAAAAAA
			AET1-2659R	AAAAGACTACTCCCCCCTTATCTC
DHD1-2889	28898626	T	DHD1-2889Ra	GAAGGTGACCAAGTTCATGCTTAGAGG	FAM
				GAATGCTGACAGGGA
		C	DHD1-2889Rg	GAAGGTCGGAGTCAACGGATTGAGGG	HEX
				AATGCTGACAGGGG
			DHD1-2889F	ACTCAACATGGGTAGCACATGAC
